# Supplementary material for: A Bayesian approach for detecting a disease that is not being modeled
Source: PubMed Central journal article supplement (PMC7048291; doi:10.1371/journal.pone.0229658), 2020-02-28
Supplement: pone.0229658.s001.pdf [file pone.0229658.s001.pdf]

## Derivations of Equations 9 and 10

To derive equation 9 note that:

$$P(\#f_m|\#\mathcal{B}, \#\mathcal{U}, \theta_{\mathcal{B},f}) = \int_0^1 \sum_{i=0}^{\#f_m} [\text{bin}(\#\mathcal{B}, i, \theta_{\mathcal{B},f}) \text{bin}(\#\mathcal{U}, \#f_m - i, \theta_{\mathcal{U},f})] d\theta_{\mathcal{U},f} \quad (1)$$

$$= \sum_{i=0}^{\#f_m} [\text{bin}(\#\mathcal{B}, i, \theta_{\mathcal{B},f}) \int_0^1 \text{bin}(\#\mathcal{U}, \#f_m - i, \theta_{\mathcal{U},f}) d\theta_{\mathcal{U},f}] \quad (2)$$

Happily, the integral reduces to a standard form with a simple solution (see, for instance, *Methods of Mathematics Applied to Calculus, Probability, and Statistics*, by Richard W. Hamming, Elsevier Academic Press, 1985):

$$\int_0^1 \text{bin}(\#\mathcal{U}, \#f_m - i, \theta_{\mathcal{U},f}) d\theta_{\mathcal{U},f} \quad (3)$$

$$= \int_0^1 C(\#\mathcal{U}, \#f_m - i) \theta_{\mathcal{U},f}^{\#f_m - i} (1 - \theta_{\mathcal{U},f})^{\#\mathcal{U} - (\#f_m - i)} d\theta_{\mathcal{U},f} \quad (4)$$

$$= C(\#\mathcal{U}, \#f_m - i) \int_0^1 \theta_{\mathcal{U},f}^{\#f_m - i} (1 - \theta_{\mathcal{U},f})^{\#\mathcal{U} - (\#f_m - i)} d\theta_{\mathcal{U},f} \quad (5)$$

$$= C(\#\mathcal{U}, \#f_m - i) \frac{\Gamma(\#f_m - i + 1) \Gamma(\#\mathcal{U} - (\#f_m - i) + 1)}{\Gamma(\#f_m - i + 1 + \#\mathcal{U} - (\#f_m - i) + 1)} \quad (6)$$

$$= C(\#\mathcal{U}, \#f_m - i) \frac{\Gamma(\#f_m - i + 1) \Gamma(\#\mathcal{U} - (\#f_m - i) + 1)}{\Gamma(\#\mathcal{U} + 2)} \quad (7)$$

$$= \frac{1}{\#\mathcal{U} + 1} \quad (8)$$

Here,  $C(a, b)$  is the number of combinations of  $a$  items taken  $b$  at a time, and  $\Gamma(x)$  is Euler's gamma function which equals  $(x-1)!$  for positive integers. Putting this together (and moving the constant out of the summation) gives

$$P(\#f_m|\#\mathcal{B}, \#\mathcal{U}, \theta_{\mathcal{B},f}) = \frac{1}{\#\mathcal{U} + 1} \sum_{i=0}^{\#f_m} \text{bin}(\#\mathcal{B}, i, \theta_{\mathcal{B},f}) \quad (9)$$

Equation 10 assumed that the counts of the findings,  $\{\#f = c_f\}$ , are conditionally independent. To show this, suppose there are findings  $f_1, \dots, f_n$ . We want to show that:

$$P(\#f_1 = c_1, \dots, \#f_n = c_n|\#\mathcal{B}, \#\mathcal{U}) = \prod_{i=1}^n P(\#f_i = c_i|\#\mathcal{B}, \#\mathcal{U}) \quad (10)$$

We will show this by induction on  $n$ . It is trivial for  $n = 1$ . Suppose it is true for  $n - 1$ . We will suppress the conditions  $\#\mathcal{B}, \#\mathcal{U}$  which are common to all formulas, and assume they are part of the knowledge base.

We can express  $P(\#f_1 = c_1, \dots, \#f_n = c_n)$  as a sum of probabilities of truth-assignments to the  $\{f_{i,j}\}$  that obey the constraints  $\#f_1 = c_1, \dots, \#f_n = c_n$ . We can also separate each of these probabilities into a product of two terms where the left term is the probability of a truth-assignment to the  $\{f_{1,j}\}$  and the right term is the probability of a truth-assignment to the  $\{f_{i>1,j}\}$ .

Let  $\{\alpha_p\}$  be the set of all truth assignments to  $\{f_{1,j}\}$  that satisfy the constraints, and let  $\{\beta_q\}$  be the set of all truth assignments to  $\{f_{i>1,j}\}$  that satisfy the constraints. Then:

$$P(\#f_1 = c_1, \dots, \#f_n = c_n) = \sum_p \sum_q P(\alpha_p \cup \beta_q) \quad (11)$$

By the independence assumptions:

$$P(\#f_1 = c_1, \dots, \#f_n = c_n) = \sum_p \sum_q P(\alpha_p)P(\beta_q) \quad (12)$$

Undistributing the  $\{\alpha_p\}$ :

$$P(\#f_1 = c_1, \dots, \#f_n = c_n) = \sum_p [P(\alpha_p) [\sum_q P(\beta_q)]] \quad (13)$$

The inner sum is over the set of probabilities of truth assignments that satisfy  $\#f_2 = c_2 \dots, \#f_n = c_n$ , so:

$$P(\#f_1 = c_1, \dots, \#f_n = c_n) = \sum_p [P(\alpha_p) [P(\#f_2 = c_2 \dots, \#f_n = c_n)]] \quad (14)$$

Undistribute again to get:

$$P(\#f_1 = c_1, \dots, \#f_n = c_n) = [\sum_p P(\alpha_p)] [P(\#f_2 = c_2 \dots, \#f_n = c_n)] \quad (15)$$

Now, the sum is over the set of probabilities of truth assignments that satisfy  $\#f_1 = c_1$ , so:

$$P(\#f_1 = c_1, \dots, \#f_n = c_n) = P(\#f_1 = c_1) P(\#f_2 = c_2 \dots, \#f_n = c_n) \quad (16)$$

Finally, applying the inductive hypothesis gives:

$$P(\#f_1 = c_1, \dots, \#f_n = c_n) = \prod_{i=1}^n P(\#f_i = c_i) \quad (17)$$
